# Supplementary material
Source: PubMed Central journal article supplement (PMC10062173)
Supplement: jvi.01803-22-s0001.pdf [file jvi.01803-22-s0001.pdf]

# 1 Supplemental information captions

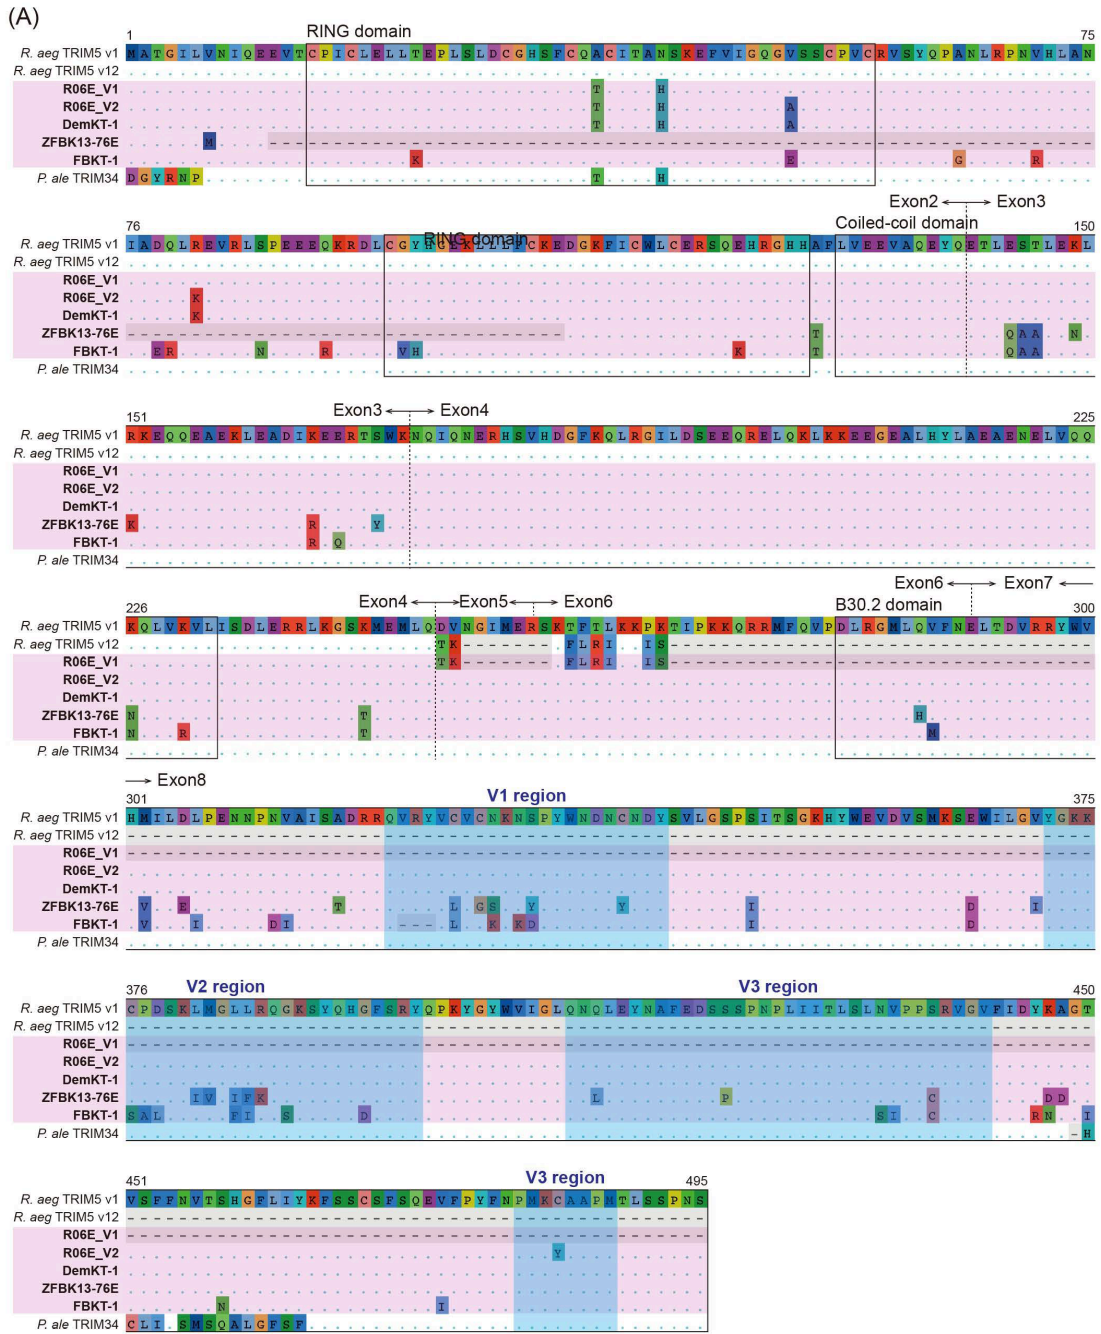

2



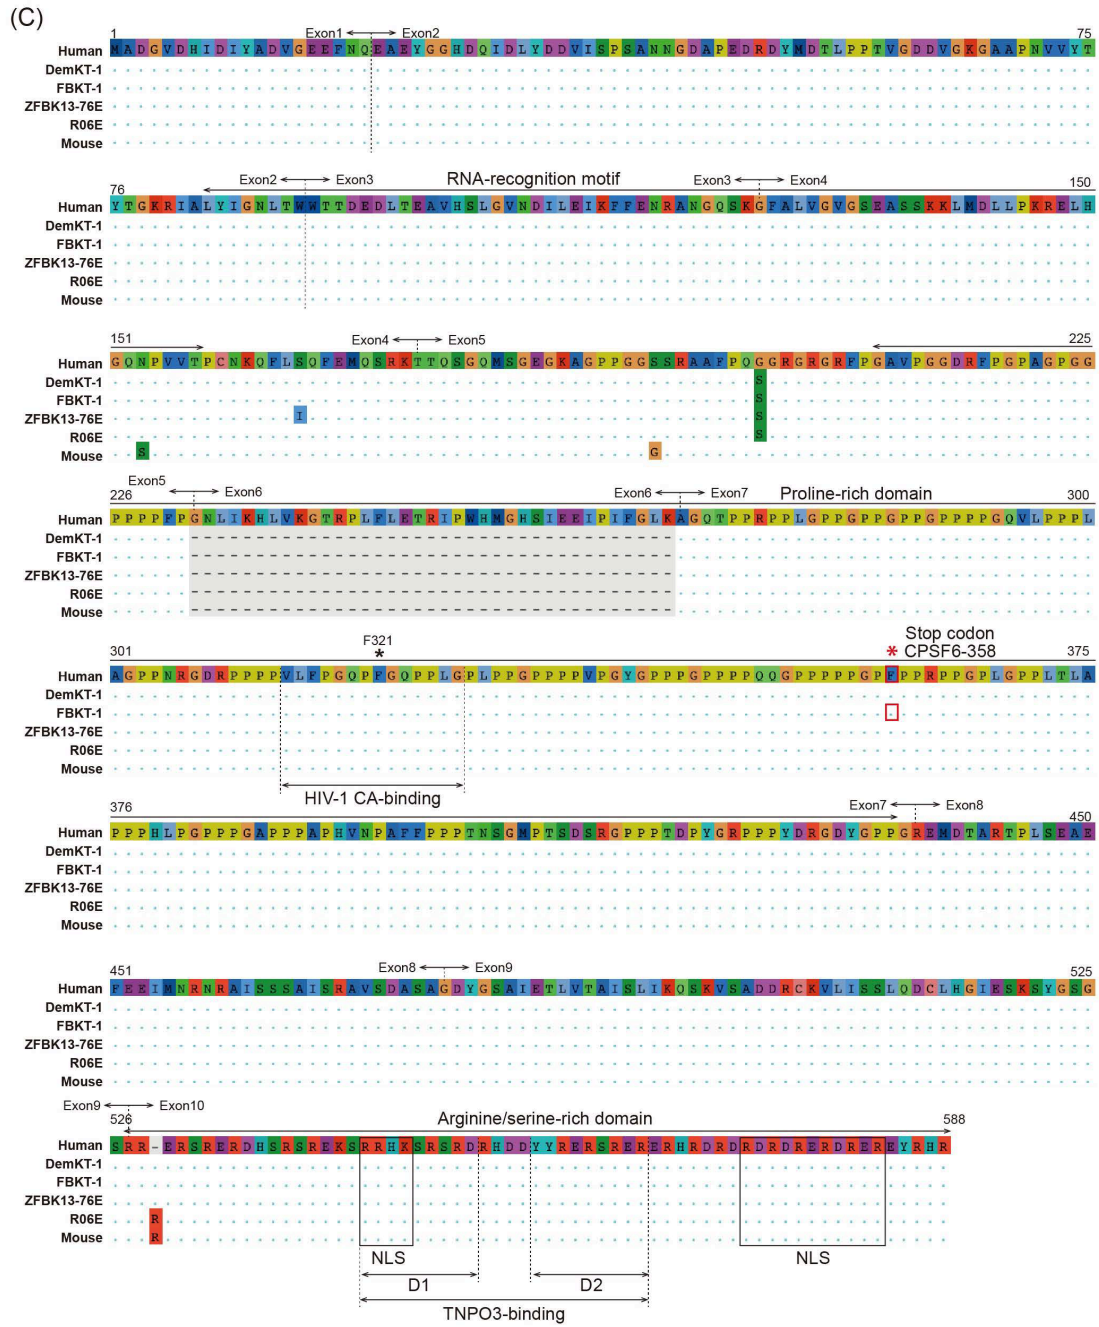

(D)

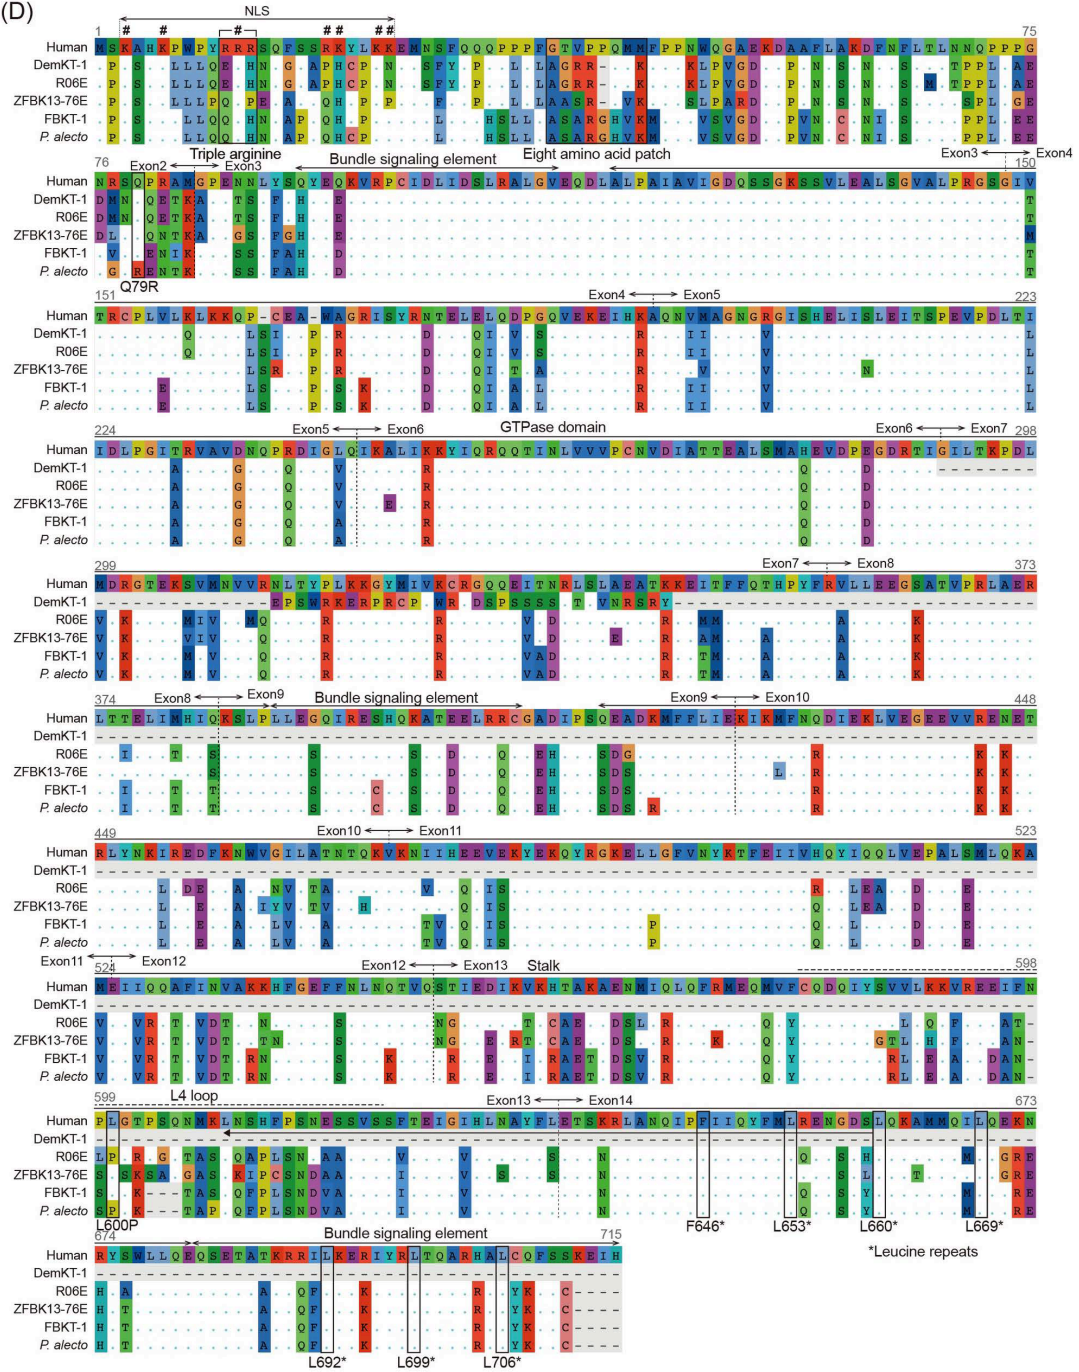

(E)

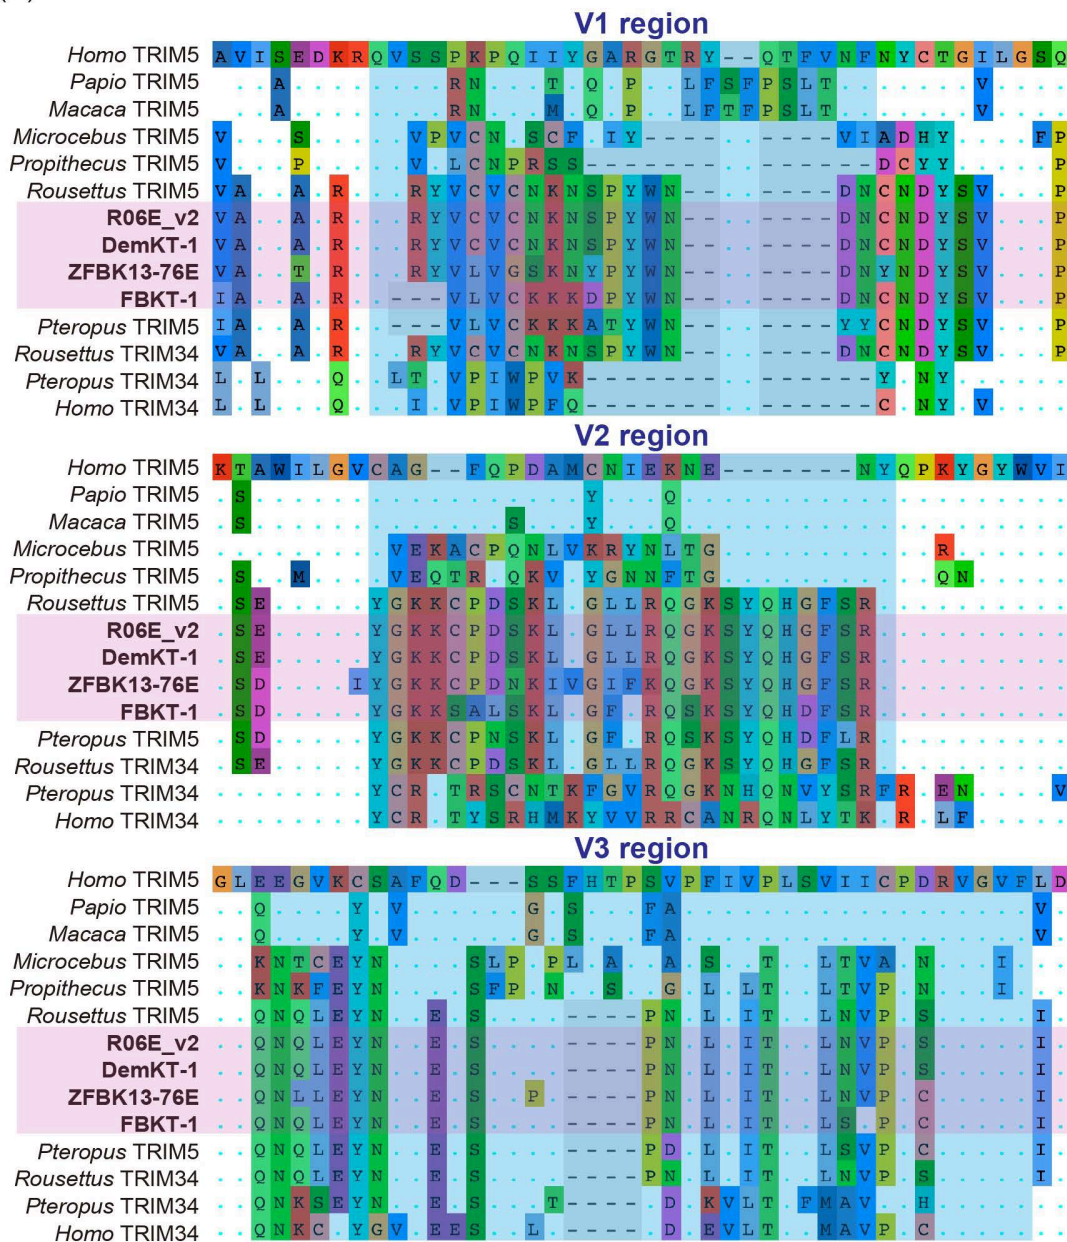

6

7 **Fig. S1 Amino acid alignments of pteropid megabat TRIM5 $\alpha$ , CPSF6, and**  
8 **Mx2/MxB, related to Figs. 1, 5, 7, and 8.**

9 (A) Amino acid alignments of pteropid megabat TRIM5 $\alpha$ , related to Fig. 5A.  
10 Amino acid sequences of newly identified megabat cDNAs were predicted  
11 computationally based on their nucleotide sequences and aligned with their

12 homologs of other pteropid megabats collected from the NCBI GenBank  
13 database. Each dot represents an amino acid identical to the top sequence,  
14 and each hyphen exhibits an amino acid deletion. The position numbering is  
15 based on the positions of the top sequence. Exon boundaries predicted from  
16 the NCBI database are shown with dotted lines. Newly identified sequences  
17 are highlighted with a magenta background. The tripartite motif and the B30.2  
18 domain are highlighted in boxes, and the variable regions in the B30.2 domain  
19 are highlighted with a cyan background. Note that the new TRIM5 cDNAs from  
20 four megabat cell lines contain the three characteristic domains, RING, B-box2,  
21 and Coiled-coil domains, confirming that they are members of the TRIM family.  
22 The TRIM5 $\alpha$  cDNA cloned from ZFBK13-76E is an exception, lacking the entire  
23 RING domain and the amino-terminal half of the B-box2 domain, whose  
24 structure is similar to the predicted *TRIM34*-like gene of *P. vampyrus*  
25 (LOC102888261, Accession # XM\_015592331, Reference ASM32557v1).  
26 From R06E cells, we successfully cloned two variants, R06E\_v1 and R06E\_v2.  
27 The R06E\_v1 isoform was closely related to the predicted transcript variant 12 of  
28 *Rousettus TRIM5*-like gene (Accession # XM\_016150076). While the  
29 nucleotide length of the R06E\_v1 was longer than that of the R06E\_v2 (1,578 bp  
30 vs. 1,488 bp), the insertion of a premature stop codon makes the translation  
31 product of the R06E\_v1 variant lose the carboxy-terminal half of the protein  
32 including the entire B30.2 domain. (B) Amino acid alignments of microbat  
33 TRIM5 $\alpha$ , related to Figs. 5A and D. Names of the newly identified genes are

34 highlighted in red. Tb1.Lu-v1, -v2, and -v3 indicates Tb1.Lu TRIM5 $\alpha$  isoforms 1,  
35 isoform 2, and isoform 3, respectively. Functional domains and the variable  
36 regions in the B30.2 domain are highlighted with black boxes and a cyan  
37 background, respectively. The consensus with a threshold of >50% homology  
38 is shown at the top of the alignment; otherwise, shown as "X." Predicted exon  
39 boundaries are shown based on the boundaries indicated for *Rousettus*  
40 *aegyptiacus* TRIM5 $\alpha$  (Fig. S1). At the carboxy-terminal end, Tb1.Lu-v2 has an  
41 additional 13 amino acid extension derived from the delivery MLV vector, likely a  
42 result of a PCR or cloning error. This insertion of the vector sequence was  
43 most likely caused by a single cytosine nucleotide deletion in the third codon of  
44 the second-to-last serine (AGC). This deletion would result in the frameshift of  
45 the last serine, changing the stop codon to a leucine with the addition of the  
46 vector-derived sequence. (C) Amino acid alignments of pteropid megabat  
47 CPSF6, related to Figs. 5B and 7. Functional domains and predicted nuclear  
48 localization signals (NLS) are as per the publication by Lee et al. (1). A black  
49 box with an asterisk indicates the stop codon experimentally introduced in the  
50 Proline-rich domain for truncation. Note that the new megabat CPSF6 include  
51 three characteristic domains; the RNA-recognition motif, the Proline-rich (P-rich)  
52 domain, and the Arginine/serine-rich (RS) domain with two NLS, confirming that  
53 they are members of the CPSF6. The four megabat CPSF6 contain 37 amino  
54 acids-deletions in the Proline-rich domain, similar to the human CPSF6 isoform  
55 1 (2). Therefore, the megabat CPSF6 showed high similarities to both human

56 and mouse CPSF6 at an amino acid sequence level with a few lineage-specific  
57 variabilities. (D) Amino acid alignments of pteropid megabat Mx2/MxB, related  
58 to Figs. 5C and 8. A black box with an asterisk indicates a position of an amino  
59 acid substitution (Q79R and L600P) assessed in this study (Fig. 8). The  
60 arginine/lysine residues in the amino-terminal NLS, phenylalanine/leucine  
61 residues in the carboxy-terminal leucine repeats, and the triple-arginine motif/the  
62 8-amino acid segment in the amino-terminal region are highlighted with #,  
63 asterisks with position numbers, and black boxes, respectively. Note that the  
64 newly identified pteropid bat Mx2 cDNAs contain three Bundle signaling  
65 elements (BSEs), the GTPase domain, and the Stalk domain, suggesting that  
66 they are close relatives to antiviral Mx proteins. The DemKT-1 Mx2 contains a  
67 premature stop codon in the GTPase domain. (E) Amino acid alignment of  
68 three variable regions in the B30.2 domain of primate and pteropid megabat  
69 TRIM5 $\alpha$  and TRIM34 collected from the NCBI GenBank database.  
70



71 **Table S1. GenBank accession numbers of the samples utilized for**  
72 **constructing phylogenetic trees, calculating  $dN/dS$  ratios, and sequence**  
73 **analysis of megabat CPSF6 isoforms, related to Figs. 1A, 5, 7E, and 8D.**

| Mitochondrial cytochrome b (Fig 1A) |                  |
|-------------------------------------|------------------|
| Species                             | Accession number |
| <i>Pteropus vampyrus</i>            | FJ561401         |
| <i>Pteropus alecto</i>              | KJ532406         |
| <i>Rousettus aegyptiacus</i>        | EU624124         |
| <i>Eonycteris spelaea</i>           | AB062476         |
| <i>Hipposideros armiger</i>         | EU434946         |
| <i>Cloeotis percivali</i>           | FJ457616         |
| <i>Rhinolophus sinicus</i>          | EU434941         |
| <i>Rhinolophus ferrumequinum</i>    | EU436673         |
| <i>Megaderma lyra</i>               | DQ888678         |
| <i>Rhinopoma microphyllum</i>       | KF874547         |
| <i>Nycteris leporinus</i>           | AF330802         |
| <i>Emballonura alecto</i>           | HQ693711         |
| <i>Phyllostomus hastatus</i>        | FJ155479         |
| <i>Desmodus rotundus</i>            | FJ155477         |
| <i>Mormoops megalophylla</i>        | AF330808         |
| <i>Pteronotus parnellii</i>         | AY604456         |

|                                                      |                  |
|------------------------------------------------------|------------------|
| <i>Noctilio albiventris</i>                          | AF330806         |
| <i>Furipterus horrens</i>                            | AY621004         |
| <i>Thyroptera tricolor</i>                           | AY621005         |
| <i>Mystacina tuberculata</i>                         | AY960981         |
| <i>Myotis (Cistugo) lesueuri</i>                     | AY485687         |
| <i>Myotis lucifugus</i>                              | AF376854         |
| <i>Myotis brandtii</i>                               | AM261886         |
| <i>Myotis davidii</i>                                | AB106591         |
| <i>Eptesicus fuscus</i>                              | AF376835         |
| <i>Tadarida brasiliensis</i>                         | JF489129         |
| <i>Natalus major</i>                                 | AY621021         |
|                                                      |                  |
| Newly cloned bat restriction factor homologs (Fig 5) |                  |
| Sample name                                          | Accession number |
| DemKT-1 TRIM5alpha                                   | OP272517         |
| EfK3B TRIM5alpha                                     | OP272518         |
| FBKT-1 TRIM5alpha                                    | OP272519         |
| R06E TRIM5alpha-v1                                   | OP272520         |
| R06E TRIM5alpha-v2                                   | OP272521         |
| Tb1Lu TRIM5alpha-v1                                  | OP272522         |
| Tb1Lu TRIM5alpha-v2                                  | OP272523         |

|                                       |              |
|---------------------------------------|--------------|
| Tb1Lu TRIM5alpha-v3                   | OP272524     |
| YubKT-1 TRIM5alpha                    | OP272525     |
| ZFBK13-76E TRIM5alpha                 | OP272526     |
| DemKT-1 CPSF6                         | OP272527     |
| FBKT-1 CPSF6                          | OP272528     |
| R06E CPSF6                            | OP272529     |
| ZFBK13-76E CPSF6                      | OP272530     |
| DemKT-1 Mx2/MxB                       | OP272531     |
| FBKT-1 Mx2/MxB                        | OP272532     |
| R06E Mx2/MxB                          | OP272533     |
| ZFBK13-76E Mx2/MxB                    | OP272534     |
|                                       |              |
| Mammalian TRIM, Mx2 and CPSF6 (Fig 5) |              |
| Sample name                           | Accession    |
| <i>Rousettus aegyptiacus</i> TRIM5    | XM_016150065 |
| <i>Homo</i> TRIM5                     | NM_033034    |
| <i>Macaca</i> TRIM5                   | NM_001032910 |
| <i>Bos</i> TRIM5                      | DQ381151     |
| <i>Sus</i> TRIM5                      | AK235927     |
| <i>Papio</i> TRIM5                    | NM_001112632 |
| <i>Nomascus</i> TRIM5                 | NM_001280113 |

|                                      |              |
|--------------------------------------|--------------|
| <i>Microcebus</i> TRIM5              | HQ413345     |
| <i>Ovis</i> TRIM5                    | NM_001318072 |
| <i>Capra</i> TRIM5                   | XM_005689800 |
| <i>Eptesicus fuscus</i> TRIM5        | XM_028137626 |
| <i>Callithrix</i> TRIM5              | XM_009007572 |
| <i>Saimiri</i> TRIM5                 | XM_010334225 |
| <i>Rhinopithecus</i> TRIM5           | XM_010364548 |
| <i>Propithecus</i> TRIM5             | XM_012654429 |
| <i>Homo</i> TRIM34                   | NM_021616    |
| <i>Rousettus aegyptiacus</i> TRIM34  | XM_016126824 |
| <i>Phyllostomus discolor</i> TRIM34  | XM_028515501 |
| <i>Myotis lucifugus</i> TRIM34       | XM_023758764 |
| <i>Eptesicus fuscus</i> TRIM34       | XM_008160439 |
| <i>Pteropus alecto</i> TRIM34        | XM_015592357 |
| <i>Pteropus vampyrus</i> TRIM34      | XM_011383134 |
| <i>Miniopterus natalensis</i> TRIM34 | XM_016215034 |
| <i>Homo</i> TRIM7                    | NM_203293    |
| <i>Bos</i> TRIM7                     | NM_001205446 |
| <i>Papio</i> TRIM7                   | XM_003900656 |
| <i>Macaca</i> TRIM7                  | XM_005558834 |
| <i>Homo</i> TRIM26                   | NM_003449    |

|                            |                |
|----------------------------|----------------|
| <i>Pan</i> TRIM26          | XM_003829748   |
| <i>Macaca</i> TRIM26       | NM_001114967   |
| <i>Bos</i> TRIM26          | XM_002697339   |
| <i>Homo</i> TRIM39         | BT007370       |
| <i>Gorilla</i> TRIM39      | XM_004043563   |
| <i>Homo</i> TRIM47         | NM_033452      |
| <i>Papio</i> TRIM47        | XM_003913451   |
| <i>Bos</i> TRIM47          | NM_001193197   |
| <i>Homo</i> TRIM65         | NM_173547      |
| <i>Macaca</i> TRIM65       | XM_028836809   |
| <i>Bos</i> TRIM65          | XM_027518688   |
| <i>Homo</i> TRIM21         | NM_003141      |
| <i>Macaca</i> TRIM21       | NM_001258045   |
| <i>Bos</i> TRIM21          | NM_182655      |
| <i>Homo</i> TRIM22         | NM_006074      |
| <i>Macaca</i> TRIM22       | EU124697       |
| <i>Canis</i> TRIM22        | XM_542402      |
| <i>Homo</i> TRIM6          | NM_001003818   |
| <i>Sus</i> TRIM6           | XM_021062360   |
| <i>Canis</i> TRIM6         | NM_001205190   |
| <i>Myotis davidii</i> Mx2* | XM_006754321.2 |

|                                        |                |
|----------------------------------------|----------------|
| <i>Eptesicus fuscus</i> Mx2*           | XM_028151882.1 |
| <i>Miniopterus natalensis</i> Mx2*     | XM_016221319.1 |
| <i>Phyllostomus discolor</i> Mx2*      | XM_036017448.1 |
| <i>Desmodus rotundus</i> Mx2*          | XM_024559822.1 |
| <i>Rhinolophus ferrumequinum</i> Mx2*  | XM_033089263.1 |
| <i>Pteropus alecto</i> Mx2*            | XM_006916730.3 |
| <i>Bos taurus</i> Mx2                  | XM_015473641.2 |
| <i>Ovis aries</i> Mx2                  | XM_012175764.3 |
| <i>Macaca mulatta</i> Mx2              | NM_001079696.1 |
| <i>Cercocebus atys</i> Mx2             | XM_012037318.1 |
| <i>Papio anubis</i> Mx2                | XM_003895463.5 |
| <i>Homo sapiens</i> Mx2                | NM_002463.2    |
| <i>Pan troglodytes</i> Mx2             | XM_016938556.2 |
| <i>Gorilla gorilla</i> Mx2             | XM_019017898.2 |
| <i>Pongo abelii</i> Mx2                | XM_002830701.2 |
| <i>Saimiri boliviensis</i> Mx2         | XM_010338253.1 |
| <i>Callithrix jacchus</i> Mx2          | XM_035283249.1 |
| <i>Aotus nancymaae</i> Mx2             | XM_021669412.1 |
| <i>Miniopterus natalensis</i> CPSF6    | XM_016199385.1 |
| <i>Eptesicus fuscus</i> CPSF6          | XM_028156487.1 |
| <i>Rhinolophus ferrumequinum</i> CPSF6 | XM_033116537.1 |

|                                    |                |
|------------------------------------|----------------|
| <i>Molossus molossus</i> CPSF6     | XM_036250921.1 |
| <i>Hipposideros armiger</i> CPSF6  | XM_019640530.1 |
| <i>Desmodus rotundus</i> CPSF6     | XM_024576197.1 |
| <i>Myotis myotis</i> CPSF6         | XM_036298067.1 |
| <i>Phyllostomus discolor</i> CPSF6 | XM_028531694.2 |
| <i>Rousettus aegyptiacus</i> CPSF6 | XM_016133567.2 |
| <i>Pteropus vampyrus</i> CPSF6     | XM_011374011.2 |
| <i>Homo sapiens</i> CPSF6          | NM_001300947.2 |
| <i>Mus musculus</i> CPSF6          | NM_001310609.1 |
| <i>Oryctolagus cuniculus</i> CPSF6 | XM_008256767.2 |
| <i>Felis catus</i> CPSF6           | XM_023257220.1 |
| <i>Sus scrofa</i> CPSF6            | XM_021090900.1 |
| <i>Ovis aries</i> CPSF6            | XM_027967466.1 |
| <i>Capra hircus</i> CPSF6          | XM_018047962.1 |
| <i>Bos taurus</i> CPSF6            | XM_005206464.4 |
| <i>Pan troglodytes</i> CPSF6       | XM_009425807.3 |
| <i>Gorilla gorilla</i> CPSF6       | XM_019038993.1 |
| <i>Pongo abelii</i> CPSF6          | XM_024256338.1 |
| <i>Papio Anubis</i> CPSF6          | XM_009181190.3 |
| <i>Macaca mulatta</i> CPSF6        | XM_015152234.2 |
| <i>Callithrix jacchus</i> CPSF6    | XM_009004183.2 |

|                                                                                                                          |                |
|--------------------------------------------------------------------------------------------------------------------------|----------------|
| <i>Saimiri boliviensis</i> CPSF6                                                                                         | XM_010338496.1 |
| <i>Aotus nancymaae</i> CPSF6                                                                                             | XM_021665939.1 |
| *: These samples were included in the calculation of dN/dS ratio for Fig. 8 together with FBKT-1 and R06E Mx2 sequences. |                |
|                                                                                                                          |                |
| SRA accession numbers (Fig. 7E)                                                                                          |                |
| SRA accession number                                                                                                     |                |
| SRR2913598                                                                                                               |                |
| SRR2914059                                                                                                               |                |
| SRR2914282                                                                                                               |                |
| SRR2914295                                                                                                               |                |
| SRR2914359                                                                                                               |                |
| SRR2914360                                                                                                               |                |
| SRR2914366                                                                                                               |                |
| SRR2914368                                                                                                               |                |
| SRR2914369                                                                                                               |                |
| SRR2914370                                                                                                               |                |
| SRR2914371                                                                                                               |                |
| SRR2914372                                                                                                               |                |
| SRR7609226                                                                                                               |                |
| SRR7548028                                                                                                               |                |



|            |
|------------|
| SRR7548029 |
| SRR7548030 |
| SRR7548031 |
| SRR7548032 |
| SRR7548033 |
| SRR7548034 |
| SRR7548035 |
| SRR7548036 |
| SRR7548037 |
| SRR7548038 |
| SRR7548039 |
| SRR7548040 |
| SRR7548041 |
| SRR7548042 |
| SRR7548043 |
| SRR7548044 |
| SRR7548045 |
| SRR7548046 |
| SRR7548047 |
| SRR7548048 |
| SRR7548049 |

|            |
|------------|
| SRR7548050 |
| SRR7548051 |
| SRR7548052 |
| SRR7548053 |
| SRR7548054 |
| SRR7548055 |
| SRR7548056 |
| SRR7548057 |
| SRR7548058 |
| SRR7548059 |
| SRR7548060 |
| SRR7548061 |
| SRR7548062 |
| SRR7548063 |
| SRR6453215 |
| SRR6453209 |
| SRR6453210 |
| SRR6453214 |
| SRR6453216 |
| SRR6453213 |
| SRR6453212 |

|            |
|------------|
| SRR6453208 |
| SRR6453211 |
| SRR7735101 |
| SRR7735102 |

74

75

76 **Supplementary Information References**

77

78 1. Lee KE, Ambrose Z, Martin TD, Oztop I, Mulky A, Julias JG, et al. Flexible use  
79 of nuclear import pathways by HIV-1. *Cell Host Microbe*. 2010;7(3):221–233.

80 2. Engelman AN. HIV capsid and integration targeting. *Viruses* [Internet]. 2021

81 Jan 18 [cited 2021 May 31];13(1):125. Available from:

82 <https://www.mdpi.com/1999-4915/13/1/125>
